# Supplementary material
Source: PubMed Central journal article supplement (PMC9579910)
Supplement: jama-e2218550-s002.pdf [file jama-e2218550-s002.pdf]

## Supplemental Online Content: Nonauthor Collaborators

\*First name, last name, and suffix (if applicable) are required and will appear in PubMed.

| <b>*Group Name(s): The HEROES-RECOVER Network</b> |                   |                              |                         |                                            |                                                 |                                                                |                                                                                                   |
|---------------------------------------------------|-------------------|------------------------------|-------------------------|--------------------------------------------|-------------------------------------------------|----------------------------------------------------------------|---------------------------------------------------------------------------------------------------|
| <b>*First Name and Middle Initial(s)</b>          | <b>*Last Name</b> | <b>*Suffix (eg, Jr, III)</b> | <b>Academic Degrees</b> | <b>Institution</b>                         | <b>Location (city, state/province, country)</b> | <b>Role or Contribution, eg, chair, principal investigator</b> | <b>Group (if more than 1 Group listed in the byline) and/or Subgroup (eg, Steering Committee)</b> |
| Gregory                                           | Joseph            |                              | MPH                     | Centers for Disease Control and Prevention | Atlanta, GA                                     | Research assistance                                            |                                                                                                   |
| John                                              | Barnes            |                              | PhD                     | Centers for Disease Control and Prevention | Atlanta, GA                                     | Collaborator                                                   |                                                                                                   |
| Eduardo                                           | Azziz-Baumgartner |                              | MD                      | Centers for Disease Control and Prevention | Atlanta, GA                                     | Collaborator                                                   |                                                                                                   |
| Melissa                                           | Arvay             |                              | PhD, MPH                | Centers for Disease Control and Prevention | Atlanta, GA                                     | Collaborator                                                   |                                                                                                   |
| Alicia                                            | Fry               |                              | MD                      | Centers for Disease Control and Prevention | Atlanta, GA                                     | Collaborator                                                   |                                                                                                   |
| Aron                                              | Hall              |                              | DVM                     | Centers for Disease Control and Prevention | Atlanta, GA                                     | Collaborator                                                   |                                                                                                   |
| Preeta                                            | Kutty             |                              | MD                      | Centers for Disease Control and Prevention | Atlanta, GA                                     | Collaborator                                                   |                                                                                                   |
| Adam                                              | MacNeil           |                              | PhD, MPH                | Centers for Disease Control and Prevention | Atlanta, GA                                     | Collaborator                                                   |                                                                                                   |
| L. Clifford                                       | Donald            |                              | MD                      | Centers for Disease Control and Prevention | Atlanta, GA                                     | Collaborator                                                   |                                                                                                   |
| Sue                                               | Reynolds          |                              | PhD, MS, MPH            | Centers for Disease Control and Prevention | Atlanta, GA                                     | Collaborator                                                   |                                                                                                   |
| Stephan                                           | Schrag            |                              | DPhil                   | Centers for Disease Control and Prevention | Atlanta, GA                                     | Collaborator                                                   |                                                                                                   |
| Nong                                              | Shang             |                              | PhD                     | Centers for Disease Control and Prevention | Atlanta, GA                                     | Collaborator                                                   |                                                                                                   |
| Robert                                            | Slaughter         |                              | BS                      | Centers for Disease Control and Prevention | Atlanta, GA                                     | Research support                                               |                                                                                                   |
| Natalie                                           | Thornburg         |                              | PhD                     | Centers for Disease Control and Prevention | Atlanta, GA                                     | Collaborator                                                   |                                                                                                   |
| Jennife                                           | Verani            |                              | MD, MPH                 | Centers for Disease Control and Prevention | Atlanta, GA                                     | Collaborator                                                   |                                                                                                   |
| Rose                                              | Wang              |                              | MPH                     | Centers for Disease Control and Prevention | Atlanta, GA                                     | Research support                                               |                                                                                                   |
| Danielle R.                                       | Hunt              |                              | PhD, MPH                | Abt Associates                             | Rockville, MD                                   | Co-investigator                                                | RECOVER Study                                                                                     |
| Brian                                             | Sokol             |                              | MSPA                    | Abt Associates                             | Rockville, MD                                   | Co-investigator                                                | RECOVER Study                                                                                     |
| Robin                                             | Bloodworth        |                              | PhD, MPH                | Abt Associates                             | Rockville, MD                                   | Data analysis                                                  | RECOVER Study                                                                                     |
| Claire                                            | Douglas           |                              | BA                      | Abt Associates                             | Rockville, MD                                   | Data analysis                                                  | RECOVER Study                                                                                     |
| Isaiah                                            | Gerber            |                              | MA                      | Abt Associates                             | Rockville, MD                                   | Data analysis                                                  | RECOVER Study                                                                                     |
| Louise                                            | Hadden            |                              | BA                      | Abt Associates                             | Rockville, MD                                   | Data analysis                                                  | RECOVER Study                                                                                     |
| Jenna                                             | Harder            |                              | PhD                     | Abt Associates                             | Rockville, MD                                   | Data analysis                                                  | RECOVER Study                                                                                     |
| Nancy                                             | McGarry           |                              | BA                      | Abt Associates                             | Rockville, MD                                   | Data analysis                                                  | RECOVER Study                                                                                     |
| Steve                                             | Pickett           |                              | BS                      | Abt Associates                             | Rockville, MD                                   | Data analysis                                                  | RECOVER Study                                                                                     |
| Brandon P.                                        | Poe               |                              | MPA                     | Abt Associates                             | Rockville, MD                                   | Data analysis                                                  | RECOVER Study                                                                                     |
| Meghan                                            | Shea              |                              | PhD                     | Abt Associates                             | Rockville, MD                                   | Data analysis                                                  | RECOVER Study                                                                                     |
| John                                              | Thacker           |                              | BS                      | Abt Associates                             | Rockville, MD                                   | Data analysis                                                  | RECOVER Study                                                                                     |
| Pearl                                             | Zheng             |                              | PhD                     | Abt Associates                             | Rockville, MD                                   | Data analysis                                                  | RECOVER Study                                                                                     |

Supplemental Online Content: Nonauthor Collaborators

\*First name, last name, and suffix (if applicable) are required and will appear in PubMed.

| *First Name and Middle Initial(s) | *Last Name | *Suffix (eg, Jr, III) | Academic Degrees   | Institution                   | Location (city, state/province, country) | Role or Contribution, eg, chair, principal investigator | Group (if more than 1 Group listed in the byline) and/or Subgroup (eg, Steering Committee) |
|-----------------------------------|------------|-----------------------|--------------------|-------------------------------|------------------------------------------|---------------------------------------------------------|--------------------------------------------------------------------------------------------|
| Peenaz                            | Mistry     |                       | MA                 | Abt Associates                | Rockville, MD                            | Data collection                                         | RECOVER Study                                                                              |
| Kelly                             | Patlan     |                       | MS                 | Abt Associates                | Rockville, MD                            | Data collection                                         | RECOVER Study                                                                              |
| Jessica                           | Flores     |                       | MS                 | Abt Associates                | Rockville, MD                            | Data collection                                         | RECOVER Study                                                                              |
| Jazmin                            | Duque      |                       | MPH                | Abt Associates                | Rockville, MD                            | Data collection                                         | RECOVER Study                                                                              |
| Laura J.                          | Edwards    |                       | MPH                | Abt Associates                | Rockville, MD                            | Co-investigator                                         | RECOVER Study                                                                              |
| Jini                              | Etolue     |                       | MS                 | Abt Associates                | Rockville, MD                            | Data collection                                         | RECOVER Study                                                                              |
| Lindsay                           | LeClair    |                       | MS, MPH            | Abt Associates                | Rockville, MD                            | Data collection                                         | RECOVER Study                                                                              |
| Khaila                            | Prather    |                       | MPH                | Abt Associates                | Rockville, MD                            | Data collection                                         | RECOVER Study                                                                              |
| Michael E.                        | Smith      |                       | BS                 | Baylor Scott and White Health | Temple, TX                               | Data analysis                                           | RECOVER Study                                                                              |
| Kempapura                         | Murthy     |                       | MPH                | Baylor Scott and White Health | Temple, TX                               | Data analysis                                           | RECOVER Study                                                                              |
| Nicole                            | Calhoun    |                       | MS                 | Baylor Scott and White Health | Temple, TX                               | Data collection                                         | RECOVER Study                                                                              |
| Eric                              | Hoffman    |                       | BS                 | Baylor Scott and White Health | Temple, TX                               | Data collection                                         | RECOVER Study                                                                              |
| Martha                            | Zayed      |                       |                    | Baylor Scott and White Health | Temple, TX                               | Data collection                                         | RECOVER Study                                                                              |
| Joel                              | Blais      |                       | B Th               | Baylor Scott and White Health | Temple, TX                               | Data collection                                         | RECOVER Study                                                                              |
| Jason                             | Ettlinger  |                       | MA                 | Baylor Scott and White Health | Temple, TX                               | Data analysis                                           | RECOVER Study                                                                              |
| Natalie                           | Settele    |                       | MBA                | Baylor Scott and White Health | Temple, TX                               | Research support                                        | RECOVER Study                                                                              |
| Rupande                           | Patel      |                       | BS                 | Baylor Scott and White Health | Temple, TX                               | Research support                                        | RECOVER Study                                                                              |
| Elisa                             | Priest     |                       | DrPH               | Baylor Scott and White Health | Temple, TX                               | Research support                                        | RECOVER Study                                                                              |
| Jennifer                          | Thomas     |                       | MS                 | Baylor Scott and White Health | Temple, TX                               | Research support                                        | RECOVER Study                                                                              |
| Muralidhar                        | Jatla      |                       | MD                 | Baylor Scott and White Health | Temple, TX                               | Research support                                        | RECOVER Study                                                                              |
| Madhava                           | Beeram     |                       | MD                 | Baylor Scott and White Health | Temple, TX                               | Research support                                        | RECOVER Study                                                                              |
| Alejandro                         | Arroliga   |                       | MD                 | Baylor Scott and White Health | Temple, TX                               | Research support                                        | RECOVER Study                                                                              |
| Yolanda                           | Prado      |                       | BS                 | Kaiser Permanente Northwest   | Portland, OR                             | Data collection                                         | RECOVER Study                                                                              |
| Daniel S.                         | Sapp       |                       | BA                 | Kaiser Permanente Northwest   | Portland, OR                             | Research support                                        | RECOVER Study                                                                              |
| Mi                                | Lee        |                       | MPH                | Kaiser Permanente Northwest   | Portland, OR                             | Data collection                                         | RECOVER Study                                                                              |
| Matt                              | Hornbrook  |                       | BS                 | Kaiser Permanente Northwest   | Portland, OR                             | Data collection                                         | RECOVER Study                                                                              |
| Kristin                           | Bialobok   |                       | RN, MSN            | Kaiser Permanente Northwest   | Portland, OR                             | Data collection                                         | RECOVER Study                                                                              |
| Jennifer                          | Alaspa     |                       | MT (ASCP), MBA, MA | St. Luke's Hospital of Duluth | Duluth, MN                               | Data Collection                                         | RECOVER Study                                                                              |
| Daniel                            | Stafki     |                       | BS                 | St. Luke's Hospital of Duluth | Duluth, MN                               | Data Collection                                         | RECOVER Study                                                                              |
| Mary                              | Robinson   |                       | MS                 | St. Luke's Hospital of Duluth | Duluth, MN                               | Data Collection                                         | RECOVER Study                                                                              |
| Jill                              | Dolezilek  |                       | BA                 | St. Luke's Hospital of Duluth | Duluth, MN                               | Data Collection                                         | RECOVER Study                                                                              |

## Supplemental Online Content: Nonauthor Collaborators

\*First name, last name, and suffix (if applicable) are required and will appear in PubMed.

| *First Name and Middle Initial(s) | *Last Name      | *Suffix (eg, Jr, III) | Academic Degrees  | Institution                   | Location (city, state/province, country) | Role or Contribution, eg, chair, principal investigator | Group (if more than 1 Group listed in the byline) and/or Subgroup (eg, Steering Committee) |
|-----------------------------------|-----------------|-----------------------|-------------------|-------------------------------|------------------------------------------|---------------------------------------------------------|--------------------------------------------------------------------------------------------|
| Leia                              | Hoffman         |                       | BS                | St. Luke's Hospital of Duluth | Duluth, MN                               | Data Collection                                         | RECOVER Study                                                                              |
| Tyna                              | Connor          |                       | BSN               | St. Luke's Hospital of Duluth | Duluth, MN                               | Data Collection                                         | RECOVER Study                                                                              |
| Catherine                         | Luzio           |                       | BS                | St. Luke's Hospital of Duluth | Duluth, MN                               | Data Collection                                         | RECOVER Study                                                                              |
| Samantha                          | Kendrick        |                       | BS                | St. Luke's Hospital of Duluth | Duluth, MN                               | Data Collection                                         | RECOVER Study                                                                              |
| Hannah                            | Cowling         |                       | BA                | University of Arizona         | Phoenix, AZ                              | Research Support                                        | AZ HEROES Study                                                                            |
| Olivia                            | Healy           |                       | BS                | University of Arizona         | Phoenix, AZ                              | Research Support                                        | AZ HEROES Study                                                                            |
| Gavin                             | Tovar           |                       | AS                | University of Arizona         | Phoenix, AZ                              | Data collection                                         | AZ HEROES Study                                                                            |
| Meccah                            | Jarrah          |                       | BS                | University of Arizona         | Phoenix, AZ                              | Data collection                                         | AZ HEROES Study                                                                            |
| Assumpta                          | Nsengiyunva     |                       | BS                | University of Arizona         | Phoenix, AZ                              | Data collection                                         | AZ HEROES Study                                                                            |
| Alison                            | Slocum          |                       | AAS               | University of Arizona         | Phoenix, AZ                              | Data collection                                         | AZ HEROES Study                                                                            |
| Lili                              | Steffen         |                       | BA, MA            | University of Arizona         | Phoenix, AZ                              | Data collection                                         | AZ HEROES Study                                                                            |
| Saskia                            | Smidt           |                       | BS, BA            | University of Arizona         | Phoenix, AZ                              | Data collection                                         | AZ HEROES Study                                                                            |
| Alissa                            | Coleman         |                       | BS, MS            | University of Arizona         | Phoenix, AZ                              | Data collection                                         | AZ HEROES Study                                                                            |
| Carly                             | Deal            |                       | BA, MPH           | University of Arizona         | Phoenix, AZ                              | Data collection                                         | AZ HEROES Study                                                                            |
| Hanna                             | Hanson          |                       | BS                | University of Arizona         | Phoenix, AZ                              | Data collection                                         | AZ HEROES Study                                                                            |
| Italia                            | Trejo           |                       | BS, MPH           | University of Arizona         | Phoenix, AZ                              | Data collection                                         | AZ HEROES Study                                                                            |
| Jeremy                            | Makar           |                       | BA                | University of Arizona         | Phoenix, AZ                              | Data collection                                         | AZ HEROES Study                                                                            |
| Sofia                             | Grijalva        |                       | BS                | University of Arizona         | Phoenix, AZ                              | Data collection                                         | AZ HEROES Study                                                                            |
| Krystal                           | Jovel           |                       | BS, MA            | University of Arizona         | Phoenix, AZ                              | Data collection                                         | AZ HEROES Study                                                                            |
| Priyanka                          | Sharma          |                       | MDS, MBA          | University of Arizona         | Phoenix, AZ                              | Data collection                                         | AZ HEROES Study                                                                            |
| Xiaoxiao                          | Sun             |                       | PhD               | University of Arizona         | Phoenix, AZ                              | Co-Investigator                                         | AZ HEROES Study                                                                            |
| Janko                             | Nikolich-Žugich |                       | MD, PhD           | University of Arizona         | Phoenix, AZ                              | Co-Investigator                                         | AZ HEROES Study                                                                            |
| Joe K.                            | Gerald          |                       | MD, PhD           | University of Arizona         | Phoenix, AZ                              | Co-Investigator                                         | AZ HEROES Study                                                                            |
| Juli                              | Fisher          |                       | BA, MA, MS, PhD   | University of Arizona         | Phoenix, AZ                              | Co-Investigator                                         | AZ HEROES Study                                                                            |
| Karl                              | Krupp           |                       | MS, PhD           | University of Arizona         | Phoenix, AZ                              | Co-Investigator                                         | AZ HEROES Study                                                                            |
| Lynn                              | Gerald          |                       | BS, MA, MSPH, PhD | University of Arizona         | Phoenix, AZ                              | Co-Investigator                                         | AZ HEROES Study                                                                            |
| Sally                             | Littau          |                       | BS,, MT, (ASCP)   | University of Arizona         | Phoenix, AZ                              | Data collection                                         | AZ HEROES Study                                                                            |
| Ferris                            | Ramadan         |                       | BS, MS            | University of Arizona         | Phoenix, AZ                              | Data collection                                         | AZ HEROES Study                                                                            |
| Erin                              | Woods           |                       | BA                | University of Arizona         | Phoenix, AZ                              | Data analysis                                           | AZ HEROES Study                                                                            |

Supplemental Online Content: Nonauthor Collaborators

\*First name, last name, and suffix (if applicable) are required and will appear in PubMed.

| *First Name and Middle Initial(s) | *Last Name | *Suffix (eg, Jr, III) | Academic Degrees | Institution           | Location (city, state/province, country) | Role or Contribution, eg, chair, principal investigator | Group (if more than 1 Group listed in the byline) and/or Subgroup (eg, Steering Committee) |
|-----------------------------------|------------|-----------------------|------------------|-----------------------|------------------------------------------|---------------------------------------------------------|--------------------------------------------------------------------------------------------|
| Flavia                            | Miuro      |                       | MSc, MPH         | University of Arizona | Phoenix, AZ                              | Data analysis                                           | AZ HEROES Study                                                                            |
| Gayatri                           | Arani      |                       | BS, MPH          | University of Arizona | Phoenix, AZ                              | Data analysis                                           | AZ HEROES Study                                                                            |
| Nicholas                          | Tang       |                       | BS               | University of Arizona | Phoenix, AZ                              | Data analysis                                           | AZ HEROES Study                                                                            |
| Nora                              | Baccam     |                       | BS               | University of Arizona | Phoenix, AZ                              | Data analysis                                           | AZ HEROES Study                                                                            |
| Ashley                            | Lowe       |                       | BS, MSPH, PhD    | University of Arizona | Phoenix, AZ                              | Data analysis                                           | AZ HEROES Study                                                                            |
| Amelia                            | Lobos      |                       | BA, LE           | University of Arizona | Phoenix, AZ                              | Data collection                                         | AZ HEROES Study                                                                            |
| April                             | Yingst     |                       | BS, MPH          | University of Arizona | Phoenix, AZ                              | Data collection                                         | AZ HEROES Study                                                                            |
| Danielle                          | Stea       |                       | BS               | University of Arizona | Phoenix, AZ                              | Data collection                                         | AZ HEROES Study                                                                            |
| Natalya                           | Mayhew     |                       | BS               | University of Arizona | Phoenix, AZ                              | Data collection                                         | AZ HEROES Study                                                                            |
| Raul                              | Nava       |                       | BS, MS           | University of Arizona | Phoenix, AZ                              | Data collection                                         | AZ HEROES Study                                                                            |
| Cynthia                           | Porter     |                       | AS, BS, MS       | University of Arizona | Phoenix, AZ                              | Data analysis                                           | AZ HEROES Study                                                                            |
| Andrea                            | Carmona    |                       |                  | University of Arizona | Phoenix, AZ                              | Data collection                                         | AZ HEROES Study                                                                            |
| Ariyah                            | strong     |                       |                  | University of Arizona | Phoenix, AZ                              | Data collection                                         | AZ HEROES Study                                                                            |
| Ashlyn                            | Flangos    |                       |                  | University of Arizona | Phoenix, AZ                              | Data collection                                         | AZ HEROES Study                                                                            |
| Caroline                          | Klinck     |                       |                  | University of Arizona | Phoenix, AZ                              | Data collection                                         | AZ HEROES Study                                                                            |
| Celia                             | Pikowski   |                       |                  | University of Arizona | Phoenix, AZ                              | Data collection                                         | AZ HEROES Study                                                                            |
| Chloe                             | Hendrix    |                       |                  | University of Arizona | Phoenix, AZ                              | Data collection                                         | AZ HEROES Study                                                                            |
| Cielo                             | Perez      |                       | BS               | University of Arizona | Phoenix, AZ                              | Data collection                                         | AZ HEROES Study                                                                            |
| Cierra                            | Morris     |                       |                  | University of Arizona | Phoenix, AZ                              | Data collection                                         | AZ HEROES Study                                                                            |
| Erika                             | Goebert    |                       |                  | University of Arizona | Phoenix, AZ                              | Data collection                                         | AZ HEROES Study                                                                            |
| Gianna                            | Taylor     |                       |                  | University of Arizona | Phoenix, AZ                              | Data collection                                         | AZ HEROES Study                                                                            |
| Jayla                             | Sowell     |                       |                  | University of Arizona | Phoenix, AZ                              | Data collection                                         | AZ HEROES Study                                                                            |
| Jen                               | Scott      |                       |                  | University of Arizona | Phoenix, AZ                              | Data collection                                         | AZ HEROES Study                                                                            |
| Joe                               | Mirabito   |                       | BS               | University of Arizona | Phoenix, AZ                              | Data collection                                         | AZ HEROES Study                                                                            |
| Jordan                            | Baker      |                       |                  | University of Arizona | Phoenix, AZ                              | Data collection                                         | AZ HEROES Study                                                                            |
| Kaitlyn                           | Naff       |                       |                  | University of Arizona | Phoenix, AZ                              | Data collection                                         | AZ HEROES Study                                                                            |
| Karysa                            | Carson     |                       |                  | University of Arizona | Phoenix, AZ                              | Data collection                                         | AZ HEROES Study                                                                            |
| Kennedy                           | Obrien     |                       |                  | University of Arizona | Phoenix, AZ                              | Data collection                                         | AZ HEROES Study                                                                            |
| Kiara                             | Earley     |                       |                  | University of Arizona | Phoenix, AZ                              | Data collection                                         | AZ HEROES Study                                                                            |
| Kristisha                         | Mevises    |                       |                  | University of Arizona | Phoenix, AZ                              | Data collection                                         | AZ HEROES Study                                                                            |
| Mayra                             | Martinez   |                       |                  | University of Arizona | Phoenix, AZ                              | Data collection                                         | AZ HEROES Study                                                                            |

## Supplemental Online Content: Nonauthor Collaborators

\*First name, last name, and suffix (if applicable) are required and will appear in PubMed.

| *First Name and Middle Initial(s) | *Last Name       | *Suffix (eg, Jr, III) | Academic Degrees          | Institution           | Location (city, state/province, country) | Role or Contribution, eg, chair, principal investigator | Group (if more than 1 Group listed in the byline) and/or Subgroup (eg, Steering Committee) |
|-----------------------------------|------------------|-----------------------|---------------------------|-----------------------|------------------------------------------|---------------------------------------------------------|--------------------------------------------------------------------------------------------|
| Mya                               | Pena             |                       |                           | University of Arizona | Phoenix, AZ                              | Data collection                                         | AZ HEROES Study                                                                            |
| Raven                             | Hilyard          |                       |                           | University of Arizona | Phoenix, AZ                              | Data collection                                         | AZ HEROES Study                                                                            |
| Rezwana                           | Islam            |                       |                           | University of Arizona | Phoenix, AZ                              | Data collection                                         | AZ HEROES Study                                                                            |
| Riley                             | Perlman          |                       |                           | University of Arizona | Phoenix, AZ                              | Data collection                                         | AZ HEROES Study                                                                            |
| Sarah                             | Murray           |                       |                           | University of Arizona | Phoenix, AZ                              | Data collection                                         | AZ HEROES Study                                                                            |
| Shelby                            | Capell           |                       | BS                        | University of Arizona | Phoenix, AZ                              | Data collection                                         | AZ HEROES Study                                                                            |
| Sienna                            | Bigler           |                       |                           | University of Arizona | Phoenix, AZ                              | Data collection                                         | AZ HEROES Study                                                                            |
| Ta'Nya                            | Thomas           |                       |                           | University of Arizona | Phoenix, AZ                              | Data collection                                         | AZ HEROES Study                                                                            |
| Tatum                             | Butcher          |                       |                           | University of Arizona | Phoenix, AZ                              | Data collection                                         | AZ HEROES Study                                                                            |
| Taylor                            | Graham           |                       |                           | University of Arizona | Phoenix, AZ                              | Data collection                                         | AZ HEROES Study                                                                            |
| Christian                         | Rojas            |                       |                           | University of Miami   | Miami, FL                                | Research support                                        | RECOVER Study                                                                              |
| John                              | Jones            |                       | MD, MPH                   | University of Miami   | Miami, FL                                | Research support                                        | RECOVER Study                                                                              |
| Brandon                           | Astor            |                       |                           | University of Miami   | Miami, FL                                | Research support                                        | RECOVER Study                                                                              |
| Ian A.                            | Lee              |                       |                           | University of Miami   | Miami, FL                                | Research support                                        | RECOVER Study                                                                              |
| Meghal S.                         | Desai            |                       | BDS                       | University of Miami   | Miami, FL                                | Research support                                        | RECOVER Study                                                                              |
| Victoria                          | Gomez            |                       |                           | University of Miami   | Miami, FL                                | Research support                                        | RECOVER Study                                                                              |
| Rachael                           | Reyes            |                       |                           | University of Miami   | Miami, FL                                | Research support                                        | RECOVER Study                                                                              |
| Damena                            | Gallimore-Wilson |                       | BA                        | University of Miami   | Miami, FL                                | Data collection                                         | RECOVER Study                                                                              |
| Roger                             | Noriega          |                       | MPH                       | University of Miami   | Miami, FL                                | Data collection                                         | RECOVER Study                                                                              |
| Annabel                           | Reyes            |                       | BS                        | University of Miami   | Miami, FL                                | Data collection                                         | RECOVER Study                                                                              |
| Brigitte                          | Madan            |                       | BA                        | University of Miami   | Miami, FL                                | Data collection                                         | RECOVER Study                                                                              |
| Alexandra                         | Cruz             |                       | BS                        | University of Miami   | Miami, FL                                | Data collection                                         | RECOVER Study                                                                              |
| Olga                              | Carrera          |                       | DIP                       | University of Miami   | Miami, FL                                | Data collection                                         | RECOVER Study                                                                              |
| Nathaly                           | Suarez           |                       | MD                        | University of Miami   | Miami, FL                                | Data collection                                         | RECOVER Study                                                                              |
| Paola                             | Feliciano        |                       | MSc                       | University of Miami   | Miami, FL                                | Data collection                                         | RECOVER Study                                                                              |
| Johanna                           | Garibaldi        |                       | BSN, RN, EMT-P            | University of Miami   | Miami, FL                                | Data collection                                         | RECOVER Study                                                                              |
| Aimee                             | Green            |                       | DNP, APRN, FNP-BC, ABAAHP | University of Miami   | Miami, FL                                | Data collection                                         | RECOVER Study                                                                              |
| Addison                           | Testoff          |                       | MPS                       | University of Miami   | Miami, FL                                | Research support                                        | RECOVER Study                                                                              |

## Supplemental Online Content: Nonauthor Collaborators

\*First name, last name, and suffix (if applicable) are required and will appear in PubMed.

| *First Name and Middle Initial(s) | *Last Name | *Suffix (eg, Jr, III) | Academic Degrees | Institution                                                                                | Location (city, state/province, country) | Role or Contribution, eg, chair, principal investigator | Group (if more than 1 Group listed in the byline) and/or Subgroup (eg, Steering Committee) |
|-----------------------------------|------------|-----------------------|------------------|--------------------------------------------------------------------------------------------|------------------------------------------|---------------------------------------------------------|--------------------------------------------------------------------------------------------|
| Rachel T.                         | Brown      |                       | PhD              | University of Utah Health, Rocky Mountain Center for Occupational and Environmental Health | Salt Lake City, UT                       | Data collection                                         | RECOVER Study                                                                              |
| Camie                             | Schaefer   |                       | PhD              | University of Utah Health, Rocky Mountain Center for Occupational and Environmental Health | Salt Lake City, UT                       | Data collection                                         | RECOVER Study                                                                              |
| Arlyne                            | Arteaga    |                       | BA               | University of Utah Health, Rocky Mountain Center for Occupational and Environmental Health | Salt Lake City, UT                       | Data collection                                         | RECOVER Study                                                                              |
| Matthew                           | Bruner     |                       | BS               | University of Utah Health, Rocky Mountain Center for Occupational and Environmental Health | Salt Lake City, UT                       | Data collection, edit writing                           | RECOVER Study                                                                              |
| Daniel                            | Dawson     |                       | BS               | University of Utah Health, Rocky Mountain Center for Occupational and Environmental Health | Salt Lake City, UT                       | Data collection                                         | RECOVER Study                                                                              |
| Emilee                            | Eden       |                       | BS               | University of Utah Health, Rocky Mountain Center for Occupational and Environmental Health | Salt Lake City, UT                       | Data collection                                         | RECOVER Study                                                                              |
| Jenna                             | Praggastis |                       | BS               | University of Utah Health, Rocky Mountain Center for Occupational and Environmental Health | Salt Lake City, UT                       | Data collection, edit writing                           | RECOVER Study                                                                              |
| Joseph                            | Stanford   |                       | MD               | University of Utah Health, Rocky Mountain Center for Occupational and Environmental Health | Salt Lake City, UT                       | Data collection                                         | RECOVER Study                                                                              |
| Jeanma                            | Mayer      |                       | MD               | University of Utah Health, Rocky Mountain Center for Occupational and Environmental Health | Salt Lake City, UT                       | Data collection                                         | RECOVER Study                                                                              |
| Marcus                            | Stucki     |                       | BS               | University of Utah Health, Rocky Mountain Center for Occupational and Environmental Health | Salt Lake City, UT                       | Data collection, analysis                               | RECOVER Study                                                                              |
| Riley                             | Campbell   |                       | BS               | University of Utah Health, Rocky Mountain Center for Occupational and Environmental Health | Salt Lake City, UT                       | Data collection                                         | RECOVER Study                                                                              |
| Kathy                             | Tran       |                       | BS               | University of Utah Health, Rocky Mountain Center for Occupational and Environmental Health | Salt Lake City, UT                       | Data collection                                         | RECOVER Study                                                                              |
| Madele                            | Smith      |                       | BS               | University of Utah Health, Rocky Mountain Center for Occupational and Environmental Health | Salt Lake City, UT                       | Data collection                                         | RECOVER Study                                                                              |
| Braydon                           | Black      |                       | BS               | University of Utah Health, Rocky Mountain Center for Occupational and Environmental Health | Salt Lake City, UT                       | Data collection                                         | RECOVER Study                                                                              |
| Christina                         | Pick       |                       | BS               | University of Utah Health, Rocky Mountain Center for Occupational and Environmental Health | Salt Lake City, UT                       | Data collection                                         | RECOVER Study                                                                              |
| Madison                           | Tallman    |                       | BS               | University of Utah Health, Rocky Mountain Center for Occupational and Environmental Health | Salt Lake City, UT                       | Data collection                                         | RECOVER Study                                                                              |
| Chapman                           | Cox        |                       | BS               | University of Utah Health, Rocky Mountain Center for Occupational and Environmental Health | Salt Lake City, UT                       | Data collection                                         | RECOVER Study                                                                              |
| Derrick                           | Wong       |                       |                  | University of Utah Health, Rocky Mountain Center for Occupational and Environmental Health | Salt Lake City, UT                       | Data collection                                         | RECOVER Study                                                                              |

## Supplemental Online Content: Nonauthor Collaborators

\*First name, last name, and suffix (if applicable) are required and will appear in PubMed.

| *First Name and Middle Initial(s) | *Last Name | *Suffix (eg, Jr, III) | Academic Degrees | Institution                                                                                | Location (city, state/province, country) | Role or Contribution, eg, chair, principal investigator | Group (if more than 1 Group listed in the byline) and/or Subgroup (eg, Steering Committee) |
|-----------------------------------|------------|-----------------------|------------------|--------------------------------------------------------------------------------------------|------------------------------------------|---------------------------------------------------------|--------------------------------------------------------------------------------------------|
| Michael                           | Langston   |                       | BS               | University of Utah Health, Rocky Mountain Center for Occupational and Environmental Health | Salt Lake City, UT                       | Data collection, analysis                               | RECOVER Study                                                                              |
| Adriel                            | Fugal      |                       | MPH              | University of Utah Health, Rocky Mountain Center for Occupational and Environmental Health | Salt Lake City, UT                       | Data collection                                         | RECOVER Study                                                                              |
| Fiona                             | Tsang      |                       |                  | University of Utah Health, Rocky Mountain Center for Occupational and Environmental Health | Salt Lake City, UT                       | Data collection                                         | RECOVER Study                                                                              |
| Maya                              | Wheeler    |                       | BS               | University of Utah Health, Rocky Mountain Center for Occupational and Environmental Health | Salt Lake City, UT                       | Data collection                                         | RECOVER Study                                                                              |
| Gretchen                          | Maughan    |                       | MPH              | University of Utah Health, Rocky Mountain Center for Occupational and Environmental Health | Salt Lake City, UT                       | Data collection                                         | RECOVER Study                                                                              |
| Megan                             | Wilson     |                       | BS               | University of Utah Health, Rocky Mountain Center for Occupational and Environmental Health | Salt Lake City, UT                       | Data collection                                         | RECOVER Study                                                                              |
| Pasha                             | Stinson    |                       | BS               | University of Utah Health, Rocky Mountain Center for Occupational and Environmental Health | Salt Lake City, UT                       | Data collection                                         | RECOVER Study                                                                              |
| Jesse                             | Williams   |                       |                  | University of Utah Health, Rocky Mountain Center for Occupational and Environmental Health | Salt Lake City, UT                       | Data collection                                         | RECOVER Study                                                                              |
| Taryn                             | Smith      |                       | BS               | University of Utah Health, Rocky Mountain Center for Occupational and Environmental Health | Salt Lake City, UT                       | Data collection                                         | RECOVER Study                                                                              |
| Seon                              | Reed       |                       |                  | University of Utah Health, Rocky Mountain Center for Occupational and Environmental Health | Salt Lake City, UT                       | Data collection                                         | RECOVER Study                                                                              |
| Jinyi                             | Mao        |                       |                  | University of Utah Health, Rocky Mountain Center for Occupational and Environmental Health | Salt Lake City, UT                       | Data collection                                         | RECOVER Study                                                                              |
| Nikki                             | allacher   |                       | BS               | University of Utah Health, Rocky Mountain Center for Occupational and Environmental Health | Salt Lake City, UT                       | Data collection                                         | RECOVER Study                                                                              |
| Kendal                            | Chatard    |                       |                  | University of Utah Health, Rocky Mountain Center for Occupational and Environmental Health | Salt Lake City, UT                       | Data collection                                         | RECOVER Study                                                                              |
| Jenna                             | Vo         |                       |                  | University of Utah Health, Rocky Mountain Center for Occupational and Environmental Health | Salt Lake City, UT                       | Data collection                                         | RECOVER Study                                                                              |
| Katie                             | Luong      |                       |                  | University of Utah Health, Rocky Mountain Center for Occupational and Environmental Health | Salt Lake City, UT                       | Data collection                                         | RECOVER Study                                                                              |
| Ryder                             | Jordin     |                       |                  | University of Utah Health, Rocky Mountain Center for Occupational and Environmental Health | Salt Lake City, UT                       | Data collection                                         | RECOVER Study                                                                              |
| Grace                             | Stewart    |                       |                  | University of Utah Health, Rocky Mountain Center for Occupational and Environmental Health | Salt Lake City, UT                       | Data collection                                         | RECOVER Study                                                                              |
| Brock                             | Bourdelle  |                       |                  | University of Utah Health, Rocky Mountain Center for Occupational and Environmental Health | Salt Lake City, UT                       | Data collection                                         | RECOVER Study                                                                              |

Supplemental Online Content: Nonauthor Collaborators

\*First name, last name, and suffix (if applicable) are required and will appear in PubMed.

| <b>*First Name and Middle Initial(s)</b> | <b>*Last Name</b> | <b>*Suffix (eg, Jr, III)</b> | Academic Degrees | Institution                                                                                | Location (city, state/province, country) | Role or Contribution, eg, chair, principal investigator | Group (if more than 1 Group listed in the byline) and/or Subgroup (eg, Steering Committee) |
|------------------------------------------|-------------------|------------------------------|------------------|--------------------------------------------------------------------------------------------|------------------------------------------|---------------------------------------------------------|--------------------------------------------------------------------------------------------|
| Timina                                   | Powaukee          |                              |                  | University of Utah Health, Rocky Mountain Center for Occupational and Environmental Health | Salt Lake City, UT                       | Data collection                                         | RECOVER Study                                                                              |
| Max                                      | Minoughan         |                              |                  | University of Utah Health, Rocky Mountain Center for Occupational and Environmental Health | Salt Lake City, UT                       | Data collection                                         | RECOVER Study                                                                              |
| Hannah                                   | Whiting           |                              |                  | University of Utah Health, Rocky Mountain Center for Occupational and Environmental Health | Salt Lake City, UT                       | Data collection                                         | RECOVER Study                                                                              |
| Anika                                    | Souza             |                              |                  | University of Utah Health, Rocky Mountain Center for Occupational and Environmental Health | Salt Lake City, UT                       | Data collection                                         | RECOVER Study                                                                              |
| Ian                                      | Arlington         |                              |                  | University of Utah Health, Rocky Mountain Center for Occupational and Environmental Health | Salt Lake City, UT                       | Data collection                                         | RECOVER Study                                                                              |
| Lauren                                   | Anderson          |                              |                  | University of Utah Health, Rocky Mountain Center for Occupational and Environmental Health | Salt Lake City, UT                       | Data collection                                         | RECOVER Study                                                                              |
| Trevor                                   | Stubbs            |                              |                  | University of Utah Health, Rocky Mountain Center for Occupational and Environmental Health | Salt Lake City, UT                       | Data collection                                         | RECOVER Study                                                                              |
| Katherine                                | Park              |                              |                  | University of Utah Health, Rocky Mountain Center for Occupational and Environmental Health | Salt Lake City, UT                       | Data collection                                         | RECOVER Study                                                                              |
| Talesha                                  | Jones             |                              |                  | University of Utah Health, Rocky Mountain Center for Occupational and Environmental Health | Salt Lake City, UT                       | Data collection                                         | RECOVER Study                                                                              |
